# Supplementary material for: In vivo monitoring of volatile metabolic trajectories enables rapid diagnosis of influenza A infection
Source: Royal Society of Chemistry journal article supplement (doi:10.1039/d1cc01061a), 2021-01-01
Supplement: d1cc01061a1.pdf [file d1cc01061a1.pdf]

Electronic Supplementary Material (ESI) for ChemComm.  
This journal is © The Royal Society of Chemistry 2021

## Electronic Supplementary Information

### ***In vivo* Monitoring of Volatile Metabolic Trajectories Enables Rapid Diagnosis of Influenza A Infection**

Zhihong Yin,<sup>ab</sup> Wenbo Huang,<sup>c</sup> Kapil Dev Singh,<sup>de</sup> Zhaoming Chen,<sup>c</sup> Xing Chen,<sup>ab</sup> Zhen Zhou,<sup>ab</sup> Zifeng Yang <sup>\*cfg</sup> Pablo Sinues <sup>\*de</sup> and Xue Li <sup>\*ab</sup>

<sup>a</sup> Institute of Mass Spectrometry and Atmospheric Environment, Jinan University, Guangzhou 510632, China

<sup>b</sup> Atmospheric Pollution Online Source Analysis Engineering Research Center of Guangdong Province, Jinan University, Guangzhou 510632, China

<sup>c</sup> State Key Laboratory of Respiratory Disease, National Clinical Research Center for Respiratory Disease, Guangzhou Institute of Respiratory Health, The First Affiliated Hospital of Guangzhou Medical University, Guangzhou 510120, China

<sup>d</sup> University Children's Hospital Basel, Basel 4056, Switzerland

<sup>e</sup> Department of Biomedical Engineering, University of Basel, Basel 4056, Switzerland

<sup>f</sup> Faculty of Chinese Medicine, Macau University of Science and Technology, Taipa 999078, PR China

<sup>g</sup> KingMed Virology Diagnostic & Translational Center, Guangzhou 510320, PR China

\*E-mail of the correspondence author: [tamylee@jnu.edu.cn](mailto:tamylee@jnu.edu.cn) (X. Li), [pablo.sinues@unibas.ch](mailto:pablo.sinues@unibas.ch) (P. Sinues), [jeffyah@163.com](mailto:jeffyah@163.com) (Z. Yang)

# Contents

|                                                                         |    |
|-------------------------------------------------------------------------|----|
| S1. Materials and Methods.....                                          | 1  |
| S1.1 Virus infection models .....                                       | 1  |
| S1.2 Measurement of viral titer.....                                    | 1  |
| S1.3 Hematoxylin and eosin (H&E) staining.....                          | 2  |
| S1.4 Real-time <i>in vivo</i> measurement of mouse breath.....          | 2  |
| S1.5 Data Pre-processing .....                                          | 3  |
| S1.6 Data Post-processing .....                                         | 6  |
| S1.7 Metabolic pathway enrichment analysis .....                        | 7  |
| S2. Results.....                                                        | 8  |
| S2.1 Physiological characterization of viral infection .....            | 8  |
| S2.2 Altered metabolic pathways as captured by real-time analysis ..... | 10 |
| S3. References .....                                                    | 12 |

## **S1. Materials and Methods**

### **S1.1 Virus infection models**

Female BALB/C mice 6–8 weeks old were purchased from Guangdong Medical Laboratory Animal Center (Guangzhou, China). The mice were housed in specific pathogen free facilities, bred, and genotyped according to the vendor's protocols. The mice were divided into four groups, i.e., IAV infected mice (IAV group), healthy control mice (Mock group), IAV infected combined with oseltamivir treatment mice (OSE group) and inactivated IAV treated mice (Inactivated IAV group) (Fig. S1a). For the IAV and OSE groups, mice anesthetized with 2.5% isoflurane were inoculated intranasally with 50  $\mu$ L of 2LD<sub>50</sub> (50% lethal dose) IAV (H1N1); the OSE group were orally administered with oseltamivir phosphate (Stru Chem Co., Ltd, China) (60 mg/kg/d) on the day of infection as well as the following four days. In case of mock and inactivated IAV groups, phosphate buffered saline (PBS) and inactivated IAV were treated with the healthy mice, respectively. To monitor viral titers in lungs and histology, mice were sacrificed by euthanasia at 1, 3, 5 and 7 days post infection. At each time point, the lungs from 5 mice per group were collected for the detection of the viral titer. The lungs from 2 mice were fixed with 10% neutral formalin for histopathological examination. All the animal experiments were performed in compliance with Chinese Animal Protection Act and the National Research Council Criteria; the study has been approved by the Laboratory Animal Ethics Committee of Affiliated First Hospital of Guangzhou Medical University (No.2019120).

### **S1.2 Measurement of viral titer**

Lung samples were homogenized in 1 mL of sterile PBS. Madin-Darby canine kidney (MDCK) cells were inoculated with tenfold serial dilutions of lung homogenates in 96-well plates. After 1 h incubation, the suspension was removed, and the cells were cultured in minimum Eagle's medium (MEM), including 2  $\mu$ g/mL trypsin. The cells were incubated for 2–3 days at 37 °C with 5% CO<sub>2</sub>. The presence of cytopathic effects

(CPE) was determined under a microscope, and viral titers were calculated by using the Reed-Muench method.

### **S1.3 Hematoxylin and eosin (H&E) staining**

As soon as the lung samples were obtained, they were immediately fixed in 10% formalin, embedded in paraffin and sectioned (4  $\mu\text{m}$  thickness) for histopathologic analysis. The sections were stained with hematoxylin and eosin (H&E) for examination by light microscopy.

### **S1.4 Real-time *in vivo* measurement of mouse breath**

Mouse was placed in a 50-mL Falcon tube and the volatile metabolites was delivered through a PTFE tube (6 mm od) into a SESI source (Super SESI, FIT, Spain) by clean dry air (without VOCs) at a steady flow rate of 1 L/min (Fig. S1b). VOC-free air was produced by a zero air generator (Beijing anjehua Co., Ltd; Beijing, China). Sample firstly passed through a particle filter (Sensabues, Sweden) and then was delivered into the source *via* a sampling line heated at 130 °C. Ions formed in the SESI source were detected by a high-resolution quadrupole orbitrap mass spectrometer (Thermo Scientific Q-Exactive Orbitrap MS, Waltham, MA USA) in positive and negative modes with spray voltages set to +2.5 kV and -2.5 kV, respectively. Nano-ESI spray solution was 0.1% formic acid water. Ion transfer capillary temperature was 275 °C. The mass range was  $m/z$  50–500 and the resolution was set to 70,000 (at  $m/z$  200).

For individual mice, it took  $\leq 30$  min for each measurement and all the mice were measured at the same time everyday post infection. The experimental period has covered the course of the infection till the inoculated mice died. Mouse health status, e.g., body weight, was recorded on the same day of the measurement. All the mice were given free access to the food and water during the 9-day experimental period. Considering the volatile compounds emitted from mouse feces may influence the

results, the mice were deprived of food and water for 2–3 hours before administration to minimize the production of feces; clean tissues were placed at the rear of the mouse to absorb urine and feces; trimethylamine (TMA), a volatile marker of feces, was monitored and the data were aborted if a significant increase in TMA intensity was observed.<sup>1</sup>

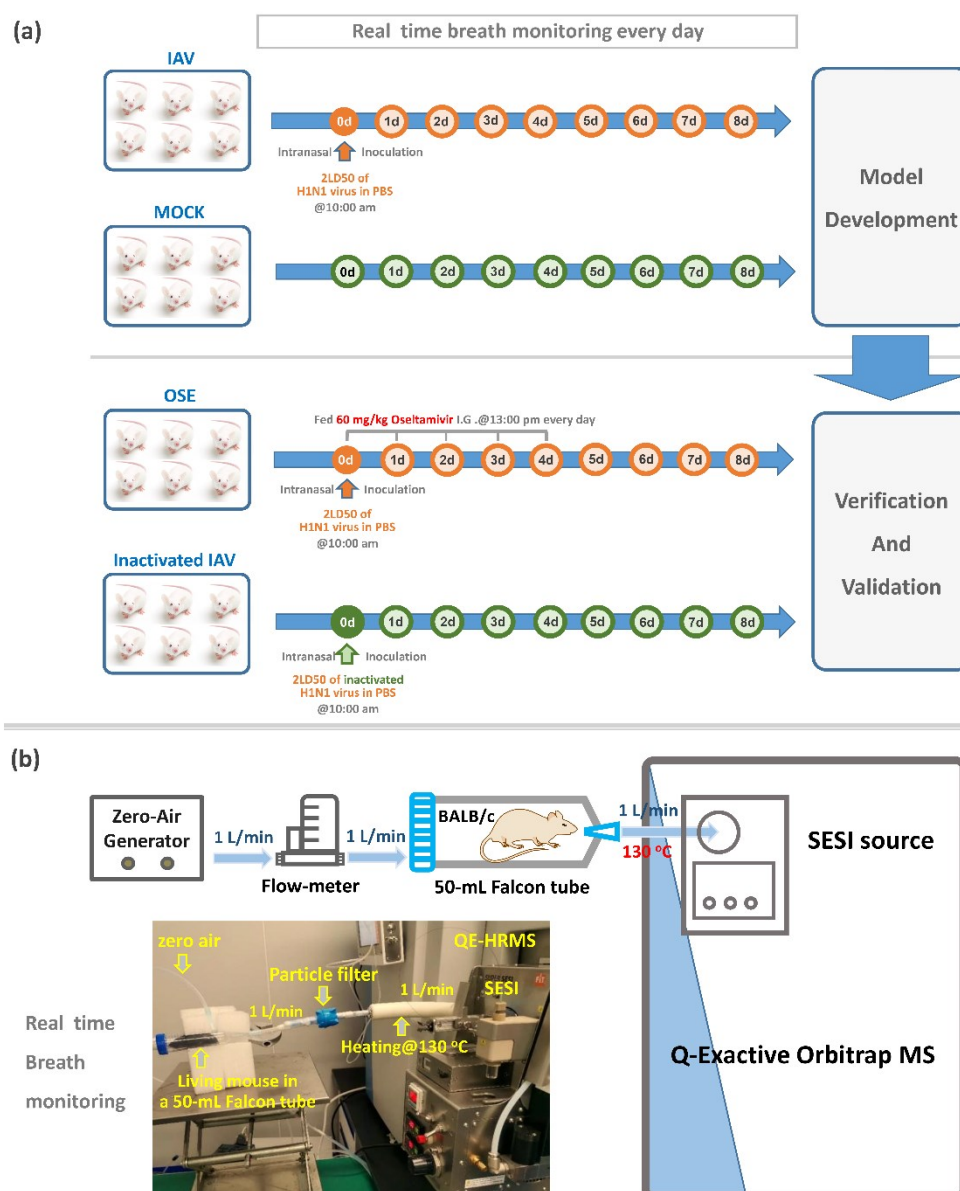

**Fig. S1** (a) Experimental design for monitoring IAV infection in living mice by volatile metabolites within the 9-day experimental period. (b) Schematic of real time *in vivo* monitoring of volatile metabolites emitted from mice by SESI-HRMS.

### S1.5 Data Pre-processing

Raw mass spectra (Thermo's proprietary RAW format) were converted into mzXML format using Proteowizard (command line tool *msconvert*). All subsequent analysis was performed using MATLAB. 20 scans per file were firstly interpolated using a shape-preserving piecewise cubic interpolation method (range  $m/z$  50–500; linearly spaced steps of  $10^{-4}$  Da). This resulted in 404 continuous mass spectra. Fig. S2 shows a zoom of the resulting 202 spectra (positive mode) at  $m/z$  255.

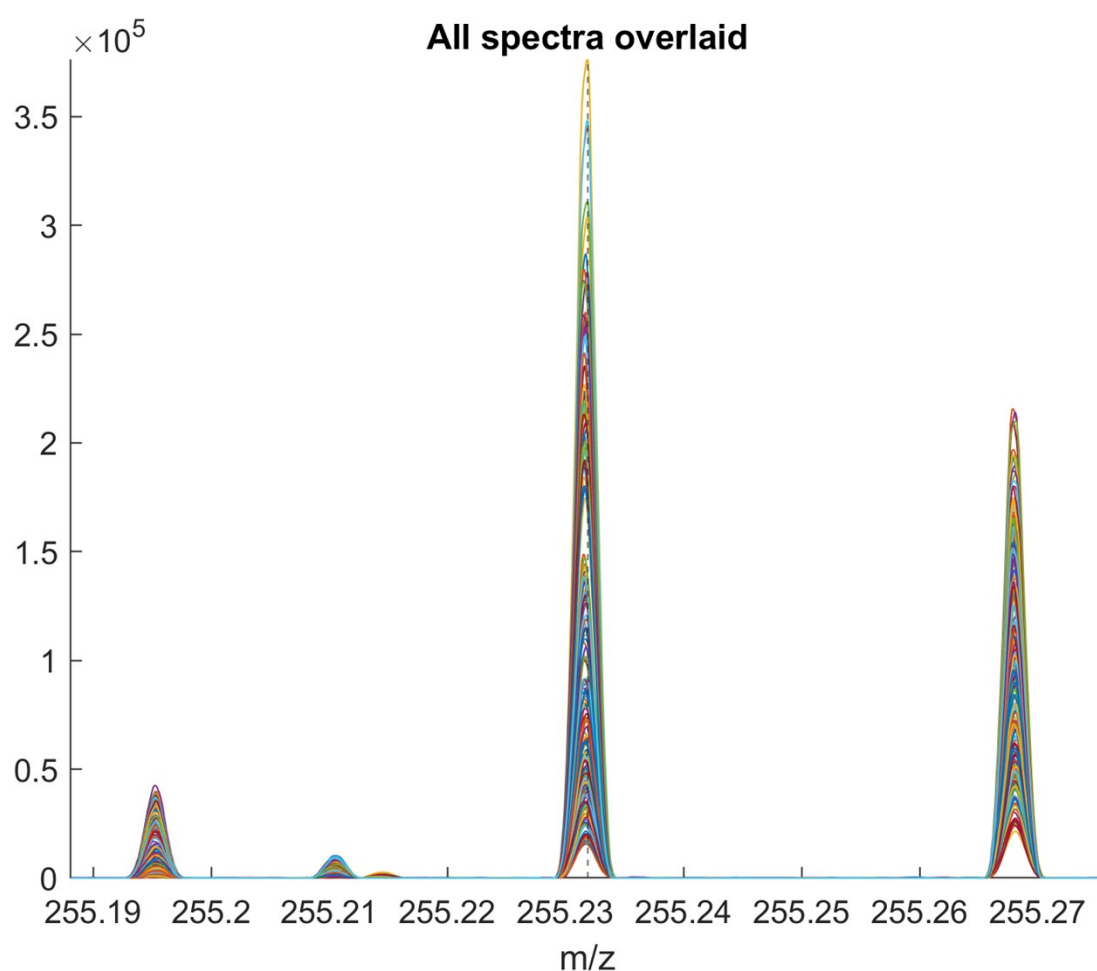

**Fig. S2** Peak alignment and calibration. Zoom of the resulting 202 spectra (positive mode) at  $m/z$  255. Note how the spectra is aligned and calibrated (reference dashed line corresponds to  $[\text{C}_{16}\text{H}_{30}\text{O}_2]^+$ ;  $m/z$  255.2319).

These continuum mass spectra were then centroided using a peak intensity threshold of 5,000 a.u. The centroided  $m/z$  values were binned by constructing a Kernel density function over the histograms of this centroid  $m/z$  list, with the appropriate band width to match the theoretical instrument resolution (70,000 at  $m/z$  200, but scaling as a function of the inverse of the square root of  $m/z$ ; Fig. S3). Fig. S4 displays an example of the histogram of the mass list and their corresponding Kernel density function at  $m/z$  255. The Kernel density functions were then centroided, resulting in a final list of 3,655 features (2,854 in positive mode and 801 in negative mode). Finally, to generate the final data matrix, we computed the signal intensity for each of these features for each sample. To do so, we summed the signal intensity of the interpolated spectra at FWHM of these 3,655 features. This resulted in a final data matrix of 202 samples x 3,655 mass spectral features. The number one was added to the matrix to avoid zero signal intensities and hence infinity when further computing ratios. All data points for each of the 24 mice were divided by the signal intensity of the first day (i.e. inoculation day 0) and the  $\log_2$  fold change (FC) were computed (with respect to the first day).

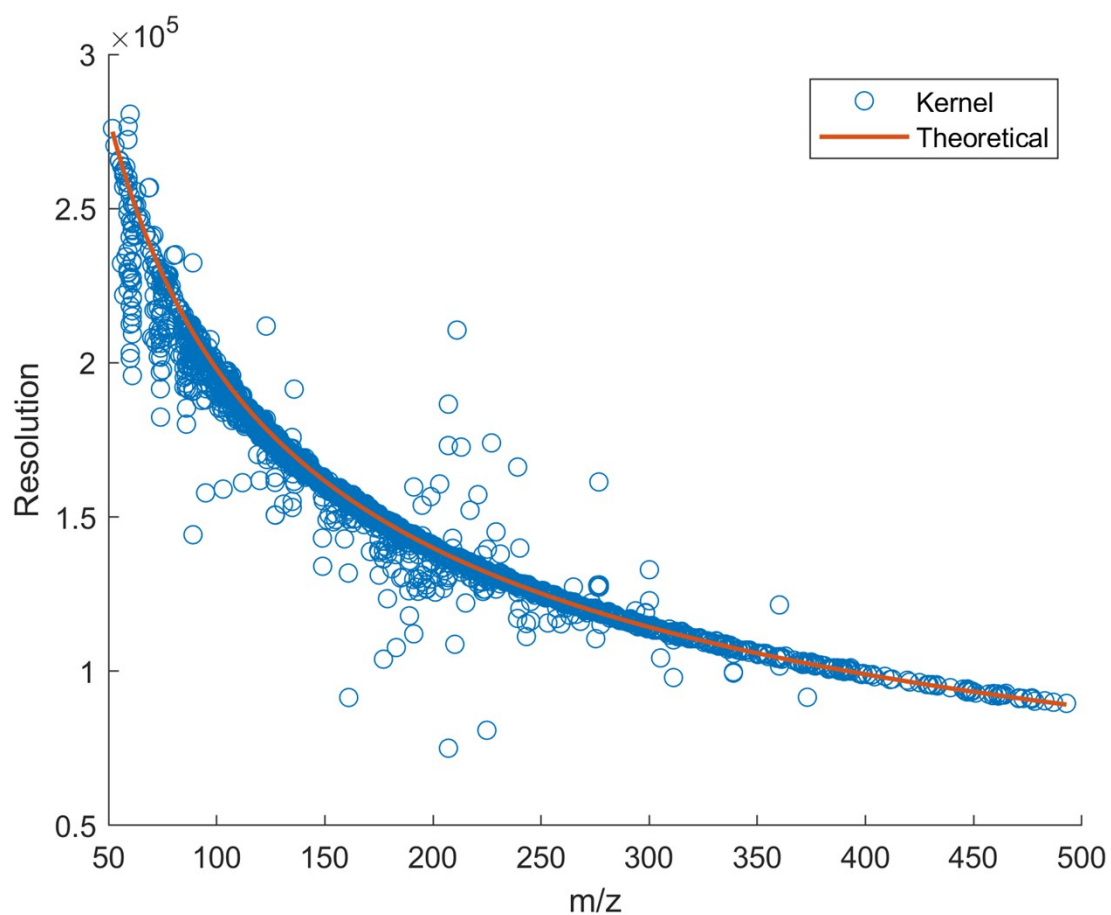

**Fig. S3** The centroided  $m/z$  values were binned by constructing a Kernel density function over the histograms of this centroid  $m/z$  list, with the appropriate band width to match the theoretical instrument resolution (70,000 at  $m/z$  200, but scaling as a function of the inverse of the square root of  $m/z$ ).



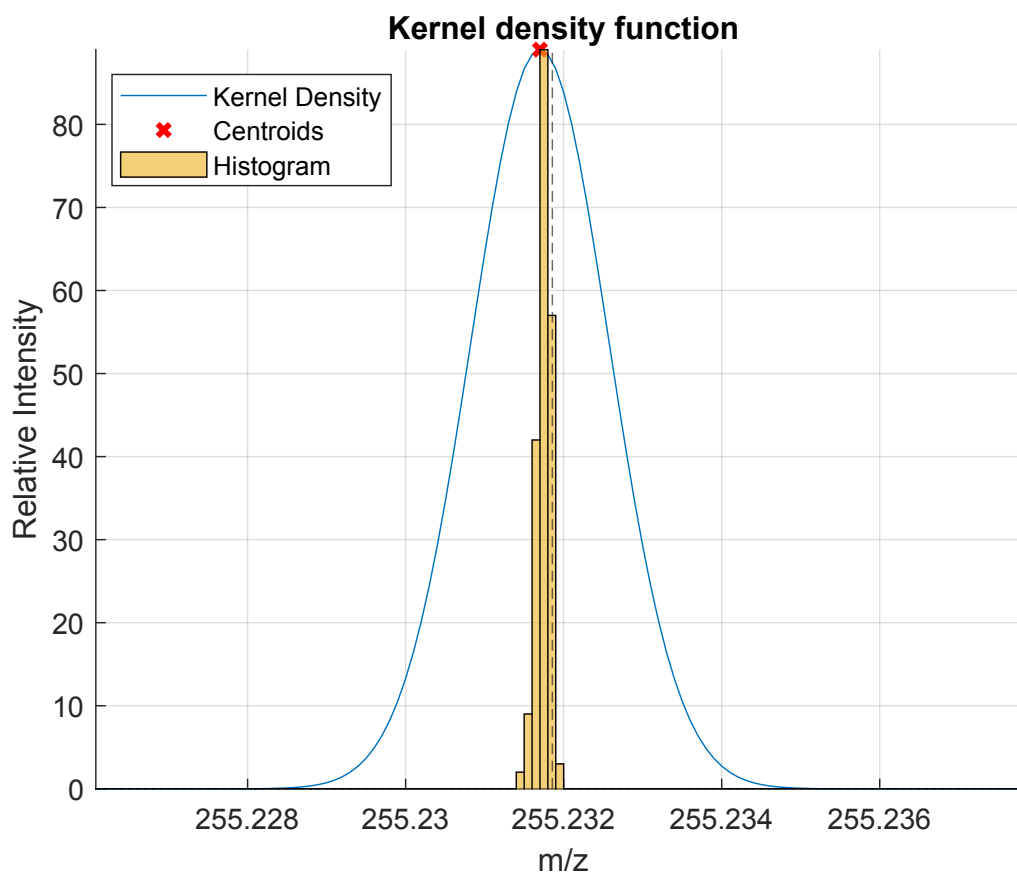

**Fig. S4** An example of the histogram of the mass list and their corresponding Kernel density function at  $m/z$  255.232.

### S1.6 Data Post-processing

The 202 x 3,655 data matrix of  $\log_2$  FC intensity values was subdivided into the one containing the IAV and mock groups (94 samples x 3,655 features) and a second submatrix containing the data for the OSE and inactivated IAV groups (108 samples x 3,655 features). The first matrix (IAV and mock groups) was utilized to identify metabolites potentially associated to the infection. The second matrix (OSE and inactivated IAV groups) was reserved for validation purposes.

In order to determine which features varied over time for the infection group differently from the control group, we applied a repeated measures ANOVA (RANOVA) test. Ions with a significant (*i.e.*  $p$ -value with Lower bound adjustment <

0.05) effect of time on ion signal intensity and significant (*i.e.*  $p$ -value with Lower bound adjustment  $< 0.05$ ) group-time interaction, were further considered.

The IAV and mock groups' data matrix comprising only the RANOVA-significant features was then subjected to Principal Component Analysis (PCA) after mean-centering. Subsequently, the OSE and inactivated IAV data matrix was projected onto this model (generated exclusively by the IAV and mock groups) to determine whether a similar pattern emerged.

Finally, we attempted to predict the OSE and inactivated IAV during the course of infection. To do so, we trained a support vector machine (SVM) model using the first two PCA scores of the IAV and mock groups' data matrix (previously filtered by RANOVA). The model was then used to predict the projected first two scores of the OSE and inactivated IAV data. Again, please note that none of the OSE and inactivated IAV data was used for model building, hence minimizing the bias.

### **S1.7 Metabolic pathway enrichment analysis**

Accurate  $m/z$ ,  $p$ -value with Lower bound adjustment and  $t$ -score were used to compute pathway enrichment using R package MetaboAnalystR (version 2.0.4).<sup>2</sup> Analysis was performed as per "MS Peaks to Pathways" module of MetaboAnalystR with following settings: mass accuracy = 2 ppm, instrument mode = mixed, method version = v1, organism library = mmu\_kegg, library version = current, Mummichog  $p$ -value cutoff = 0.001 and permutation number = 1000. Additionally, we used custom adducts for positive (M+H [1+], M(C<sup>13</sup>)+H [1+], M-H<sub>2</sub>O+H [1+], M-NH<sub>3</sub>+H [1+], M+NH<sub>4</sub> [1+]) and negative (M-H [1-], M(C<sup>13</sup>)-H [1-], M-H<sub>2</sub>O-H [1-]) modes.

## **S2. Results**

### **S2.1 Physiological characterization of viral infection**

The virus replication peaked at 3 dpi among virus infected mice treated with or without oseltamivir, with decrease trends from 5 to 7 dpi. (Fig. S5a). We further examined the histopathologic changes in the lungs of the mice. At 1 dpi, virus infected-mice showed interstitial pneumonia in the lung area adjacent to bronchioles, which became more severe with lymphocytic infiltration at 3 dpi. At 5 and 7 dpi, the lesion extended to a larger area of lung. The histopathologic changes in the lungs of oseltamivir treated-mice were much milder with reduced infiltration of inflammatory cells. (Fig. S5b).

IAV group mice systematically lost weight from 2 dpi and weight loss reached maximal value ( $28.0\pm 5.7\%$ ) at or before 9 dpi (Fig. S5c), showing a clear indication of infection development. In contrast, the mock group mice systematically gained weight, especially during the first two days. Regarding OSE and inactivated IAV groups, a similar situation was found, although the differences between the two groups were not stark, as expected. The OSE group almost resembled the IAV group except that a sharp drop in body weight in OSE group was delayed to 3–4 dpi. The delay was probably caused by the effect of the antiviral therapy, which was administered during the first five days of the experiment. However, the treatment failed to ultimately prevent critical infection, as evidenced by the loss weight experienced by five mice ( $32.4\pm 2.4\%$  at 9 dpi) (Fig. S5c). Interestingly, one mouse in the OSE group recovered weight post treatment with the antiviral medication (solid trace with triangles in right panel of Fig. S5c).

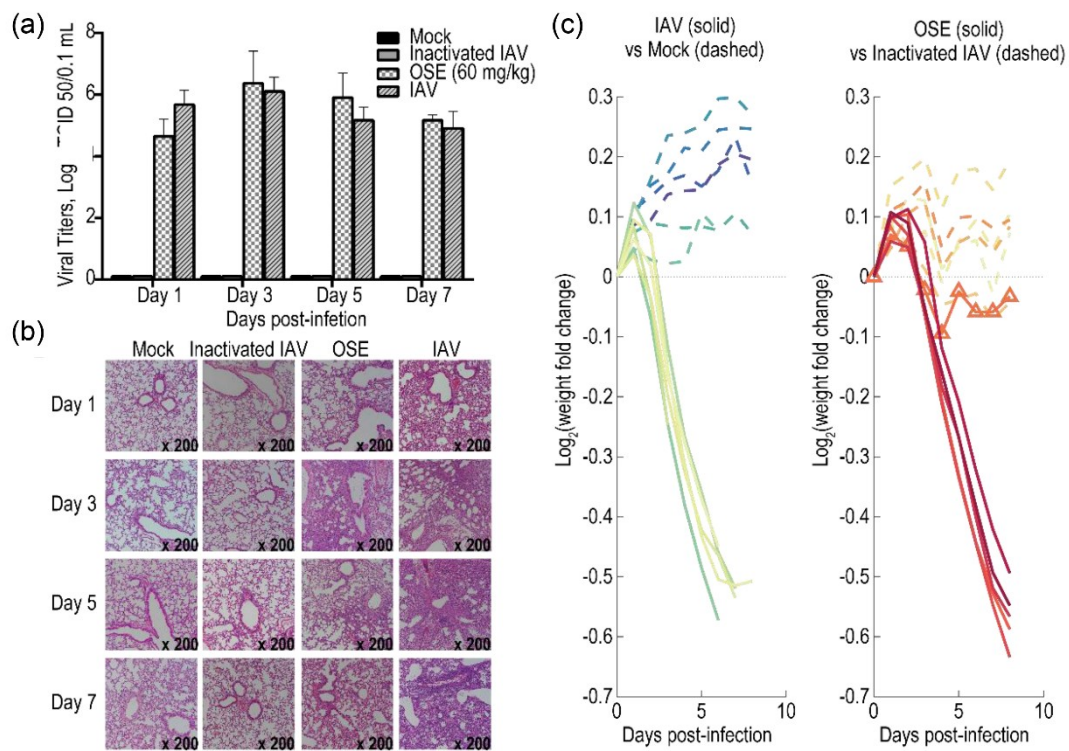

**Fig. S5** Devastating impact of the infection over time. (a) The mean lung virus titers ( $\pm$ SD) recovered from mice ( $n=5$ ) of different groups at 1, 3, 5 and 7 dpi. (b) The histological injuries in the lungs of different groups. The lung tissues were harvested immediately after the mice were executed on day post infection 1, 3, 5 and 7, and the lung sections were prepared and stained with HE; Original magnification: x 200. (c) Change in body weight during the course of infection represented as  $\log_2(\text{Fold change of weight})$ . The solid trace with triangles corresponds to one mouse in the OSE group that showed a different response to the rest of the group.

## S2.2 Altered metabolic pathways as captured by real-time analysis

**Table S1** Comparison of top 40 metabolic pathways altered by H1N1 virus infection captured in mouse breath in this study with pathways reported in other studies.

| No. | Pathway                                     | Total_Size | Hits | Combined_Pvals | Class                           | A549 Cells <sup>†</sup> | Mice <sup>‡</sup> | Ferrets <sup>§</sup> |
|-----|---------------------------------------------|------------|------|----------------|---------------------------------|-------------------------|-------------------|----------------------|
| 1   | Glyoxylate and dicarboxylate metabolism     | 31         | 14   | 0.00001        | Carbohydrate metabolism         |                         |                   |                      |
| 2   | Alanine, aspartate and glutamate metabolism | 28         | 17   | 0.00021        | Amino acid metabolism           | √                       | √                 | √                    |
| 3   | Nitrogen metabolism                         | 6          | 4    | 0.00052        | Energy metabolism               | √                       |                   |                      |
| 4   | Purine metabolism                           | 66         | 5    | 0.00055        | Nucleotide metabolism           | √                       | √                 |                      |
| 5   | Arginine biosynthesis                       | 14         | 10   | 0.00167        | Amino acid metabolism           |                         |                   |                      |
| 6   | Propanoate metabolism                       | 19         | 8    | 0.00195        | Carbohydrate metabolism         |                         |                   |                      |
| 7   | Glycerolipid metabolism                     | 7          | 4    | 0.00905        | Lipid metabolism                |                         |                   |                      |
| 8   | D-Glutamine and D-glutamate metabolism      | 6          | 6    | 0.01262        | Metabolism of other amino acids | √                       |                   |                      |
| 9   | Citrate cycle (TCA cycle)                   | 16         | 6    | 0.01913        | Carbohydrate metabolism         |                         | √                 |                      |
| 10  | Fatty acid degradation                      | 36         | 2    | 0.02419        | Lipid metabolism                |                         |                   |                      |
| 11  | Pyruvate metabolism                         | 19         | 9    | 0.03753        | Carbohydrate metabolism         |                         |                   |                      |
| 12  | Sphingolipid metabolism                     | 9          | 5    | 0.03901        | Lipid metabolism                |                         |                   |                      |
| 13  | Butanoate metabolism                        | 15         | 9    | 0.05935        | Carbohydrate metabolism         | √                       |                   |                      |
| 14  | Arginine and proline metabolism             | 37         | 25   | 0.1126         | Amino acid metabolism           | √                       | √                 | √                    |
| 15  | Pyrimidine metabolism                       | 39         | 9    | 0.121          | Nucleotide metabolism           | √                       | √                 |                      |
| 16  | Galactose metabolism                        | 27         | 10   | 0.136          | Carbohydrate metabolism         | √                       |                   |                      |
| 17  | Tyrosine metabolism                         | 42         | 32   | 0.1563         | Amino acid metabolism           |                         |                   | √                    |
| 18  | Biosynthesis of unsaturated fatty acids     | 34         | 10   | 0.1682         | Lipid metabolism                |                         |                   |                      |
| 19  | Glycine, serine and threonine metabolism    | 31         | 20   | 0.1686         | Amino acid metabolism           | √                       | √                 | √                    |
| 20  | Cysteine and methionine metabolism          | 33         | 8    | 0.1946         | Amino acid metabolism           | √                       |                   |                      |
| 21  | Fatty acid elongation                       | 30         | 1    | 0.2372         | Lipid metabolism                |                         |                   |                      |
| 22  | Glycolysis / Gluconeogenesis                | 23         | 6    | 0.2448         | Carbohydrate metabolism         |                         |                   |                      |
| 23  | Selenocompound metabolism                   | 16         | 2    | 0.3207         | Metabolism of other amino acids |                         |                   |                      |

|    |                                                     |    |    |        |                                             |   |   |
|----|-----------------------------------------------------|----|----|--------|---------------------------------------------|---|---|
| 24 | Inositol phosphate metabolism                       | 21 | 2  | 0.3986 | Carbohydrate metabolism                     |   |   |
| 25 | Synthesis and degradation of ketone bodies          | 5  | 2  | 0.4017 | Lipid metabolism                            |   |   |
| 26 | Glutathione metabolism                              | 19 | 6  | 0.4162 | Metabolism of other amino acids             | √ |   |
| 27 | Ubiquinone and other terpenoid-quinone biosynthesis | 9  | 3  | 0.5183 | Metabolism of cofactors and vitamins        |   |   |
| 28 | Porphyrin and chlorophyll metabolism                | 27 | 3  | 0.5648 | Metabolism of cofactors and vitamins        | √ |   |
| 29 | Drug metabolism - other enzymes                     | 27 | 3  | 0.5648 | Xenobiotics biodegradation and metabolism   |   |   |
| 30 | Fructose and mannose metabolism                     | 18 | 6  | 0.5999 | Carbohydrate metabolism                     | √ |   |
| 31 | Primary bile acid biosynthesis                      | 46 | 8  | 0.6102 | Lipid metabolism                            | √ |   |
| 32 | Terpenoid backbone biosynthesis                     | 15 | 2  | 0.6594 | Metabolism of terpenoids and polyketides    |   |   |
| 33 | beta-Alanine metabolism                             | 21 | 9  | 0.6667 | Metabolism of other amino acids             | √ |   |
| 34 | Valine, leucine and isoleucine degradation          | 35 | 12 | 0.7194 | Amino acid metabolism                       |   |   |
| 35 | Aminoacyl-tRNA biosynthesis                         | 22 | 16 | 0.7198 | Genetic Information Processing; Translation | √ |   |
| 36 | Phenylalanine metabolism                            | 12 | 10 | 0.7426 | Amino acid metabolism                       |   | √ |
| 37 | Fatty acid biosynthesis                             | 10 | 5  | 0.7749 | Lipid metabolism                            | √ |   |
| 38 | Glycerophospholipid metabolism                      | 13 | 3  | 0.8027 | Lipid metabolism                            | √ |   |
| 39 | Valine, leucine and isoleucine biosynthesis         | 8  | 7  | 0.8467 | Amino acid metabolism                       |   | √ |
| 40 | Histidine metabolism                                | 16 | 13 | 0.8807 | Amino acid metabolism                       | √ | √ |

<sup>†</sup>[3]; <sup>‡</sup>[4]; <sup>§</sup>[5].

### S3. References

- 1 X. Chen, K. D. Zhang, Z. H. Yin, M. L. Fang, W. D. Pu, Z. N. Liu, L. Li, P. Sinues, R. Dallmann, Z. Zhou and X. Li, *Anal. Chem.* 2021, DOI: 10.1021/acs.analchem.1c00509.
- 2 W. Q. Pan, Z. Y. Dong, F. Li, W. X. Meng, L. Q. Feng, X. F. Niu, C. F. Li, Q. F. Luo, Z. F. Li, C. J. Sun and L. Chen, *Nat. Commun.*, 2013, **4**, 2369.
- 3 X. D. Tian, K. Zhang, J. Min, C. Chen, Y. Cao, C. Ding, W. J. Liu and J. Li, *Viruses-Basel*, 2019, **11**, 1007.
- 4 J. D. Chandler, X. Hu, E. J. Ko, S. Park, Y. T. Lee, M. Orr, J. Fernandes, K. Uppal, S. M. Kang, D. P. Jones and Y. M. Go, *Am. J. Physiol-Reg. I.*, 2016, **311**, R906-R916.
- 5 D. J. Beale, D. Y. Oh, A. V. Karpe, C. Tai, M. S. Dunn, D. Tilmanis, E. A. Palombo and A. C. Hurt, *Metabolomics*, 2019, **15**, 33.
